# Supplementary material for: Noninvasive serum biomarkers for liver fibrosis in NAFLD: current and future
Source: PubMed Central journal article supplement — Clin Mol Hepatol. 2022 Nov 22;29(Suppl):S157–70. doi: 10.3350/cmh.2022.0348 (PMC10029954; doi:10.3350/cmh.2022.0348), 2022-11-22
Supplement: cmh-2022-0348-Supplementary-Table-1.pdf [file cmh-2022-0348-Supplementary-Table-1.pdf]

**Supplementary Table 1.** Brief summary of the 21 therapeutic drug trials examined in Ampuero et al.'s 2022 meta-analysis of variables influencing the interpretation of clinical trial results in NAFLD<sup>22</sup>

| Drug                      | Study                                | Noninvasive biomarkers used | Fibrosis changes reported by study                                                                                                                   | Brief summary                                                                                                                                                                                                                                                                                                                                                                                                                                                                                                                                                                | Included for review in Table 3 |
|---------------------------|--------------------------------------|-----------------------------|------------------------------------------------------------------------------------------------------------------------------------------------------|------------------------------------------------------------------------------------------------------------------------------------------------------------------------------------------------------------------------------------------------------------------------------------------------------------------------------------------------------------------------------------------------------------------------------------------------------------------------------------------------------------------------------------------------------------------------------|--------------------------------|
| Alderfermin               | Harrison et al. <sup>1</sup> (2021)  | ELF™, PRO-C3                | A trend toward fibrosis improvement.                                                                                                                 | Decrease in ELF™ and PRO-C3 scores, when compared to placebo $P=0.15$ and $P=0.001$ for ELF™ and PRO-C3 respectively.                                                                                                                                                                                                                                                                                                                                                                                                                                                        | Yes                            |
| Aramchol                  | Ratzui et al. <sup>2</sup> (2018)    | FIB-4, NFS, ELF™            | Fibrosis improvement by 1 stage or more was numerically higher in the 600 mg arm than in the placebo arm, without reaching statistical significance. | No data on ELF and limited data on FIB-4 and NFS is provided. Data supporting the findings of the study are owned by Galmet Research and Development and the article states the data is not publicly available.                                                                                                                                                                                                                                                                                                                                                              | Supplementary Table 2 only     |
| Belapectin                | Chalalani et al. <sup>3</sup> (2020) | ELF™, FibroTest®, VCTE      | No improvement in fibrosis.                                                                                                                          | Study notes that reasons for no improvement in fibrosis include: (i) the duration of therapy was not sufficiently long and (ii) the study population included patients with established cirrhosis and portal hypertension, a group in who fibrosis reversal may not be possible.                                                                                                                                                                                                                                                                                             | Yes                            |
| Cenicriviroc              | Friedman et al. <sup>4</sup> (2018)  | NFS, FIB-4, APRI, ELF™      | Cenicriviroc shows a significant anti-fibrotic benefit at year 1.                                                                                    | Post-hoc analysis explored the relationship between change in fibrosis indices and improvement in liver histology. In general, more favourable changes (i.e., smaller mean increases or larger mean decreases) in fibrosis indices (NFS, FIB-4, APRI, and ELF™) were observed in subjects in whom fibrosis improved by $\geq 1$ stage at year 1 relative to subjects in whom fibrosis did not improve. However, the post-hoc analysis was not powered to demonstrate a difference for treatment (cenicriviroc or placebo) and/or subgroup (histological improvement or not). | Yes                            |
| Cilofexor and Firsocostat | Loomba et al. <sup>5</sup> (2021)    | ELF™, FibroTest®, VCTE      | In patients with bridging fibrosis and cirrhosis, cilofexor/firsocostat may have an anti-fibrotic effect.                                            | Cohort included $\geq F3$ , therefore appropriate use of noninvasive biomarkers. Treatment with cilofexor/firsocostat for 48 weeks led to improvements in ELF and liver stiffness measured by VCTE. Post-hoc analyses of liver fibrosis, assessed by a machine learning approach, suggest fibrosis regression in patients with cilofexor/firsocostat.                                                                                                                                                                                                                        | Yes                            |

Supplementary Table 1. Continued

| Drug             | Study                                          | Noninvasive biomarkers used                           | Fibrosis changes reported by study                                                                                                                                                                                                                                                        | Brief summary                                                                                                                                                                                                                                                                                                                                      | Included for review in Table 3 |
|------------------|------------------------------------------------|-------------------------------------------------------|-------------------------------------------------------------------------------------------------------------------------------------------------------------------------------------------------------------------------------------------------------------------------------------------|----------------------------------------------------------------------------------------------------------------------------------------------------------------------------------------------------------------------------------------------------------------------------------------------------------------------------------------------------|--------------------------------|
| Efruxifermin     | Harrison et al. <sup>6</sup> (2021)            | ELF™, PRO-C3                                          | Noninvasive measure of fibrogenesis (PRO-C3 and ELF™) corroborate the observed improvements in liver histopathology.                                                                                                                                                                      | Cohort includes F1 and F2. ELF™ is currently only validated for ≥F3. The changes observed to ELF™ scores may not necessarily be an accurate representation to the changes in liver observed in histopathology.                                                                                                                                     | Yes                            |
| Elafibranor      | Ratziu et al. <sup>7</sup> (2016)              | NFS, FibroTest®                                       | Post-hoc analysis of data showed that elafibranor resolved NASH without worsening of fibrosis.                                                                                                                                                                                            | Limited data available. Cohort includes F0, F1, and F2. NFS and FibroTest® are both currently validated for ≥F3 only.                                                                                                                                                                                                                              | Yes                            |
| Elafibranor      | Harrison et al. <sup>8</sup> (2020)            | Follow-up paper from Ratziu et al. <sup>7</sup> above | Elafibranor did not meet the key secondary endpoint of fibrosis improvement.                                                                                                                                                                                                              | Conference report only.                                                                                                                                                                                                                                                                                                                            | No                             |
| Emricasan        | Harrison et al. <sup>9</sup> (2020)            |                                                       | Emricasan did not improve liver histology.                                                                                                                                                                                                                                                | Noninvasive biomarkers not used (ALT and AST only)                                                                                                                                                                                                                                                                                                 | No                             |
| Lanifibranor     | Francque et al. <sup>10</sup> (2021)           | ELF™, FIB-4, PRO-C3, VCTE                             | Markers of fibrosis (scores on the ELF™ and FIB-4) did not improve.                                                                                                                                                                                                                       | Authors' note that the changes in biomarkers are not fully validated as surrogates of histologic change and the results should be interpreted with caution, particularly in short-term trials.                                                                                                                                                     | Yes                            |
| Liraglutide      | Armstrong et al. <sup>11</sup> (2016)          | ELF™                                                  | Fewer patients receiving liraglutide had progression of fibrosis (when compared to placebo). The absence of a difference in mean change in fibrosis stage between intervention and placebo probably reflects the duration of treatment, and a longer treatment course should be assessed. | When compared to placebo, the mean change for ELF™ from baseline to 48 weeks was greater in the intervention arm ( $P=0.05$ ). Cohort includes F0, F1, and F2. ELF™ is currently only validated for ≥F3. The changes observed to ELF™ scores may not necessarily be an accurate representation to the changes in liver observed in histopathology. | Yes                            |
| MSDC-0602K       | Harrison et al. <sup>12</sup> (2020)           | APRI, ELF™, FIB-4, FibroTest®                         | MSDC-0602K did not demonstrate significant effects to liver histology with the biopsy techniques used.                                                                                                                                                                                    | Cohorts include F1 and F2. Serum biomarkers used are only validated for ≥F3. No follow up data showing the changes in biomarkers used was recorded in the supplementary information.                                                                                                                                                               | Yes                            |
| Obeticholic acid | Neuschwander-Tetri et al. <sup>13</sup> (2015) |                                                       | The improvement in fibrosis, although small, shows that this therapy might be beneficial in preventing progression to fibrosis.                                                                                                                                                           | Noninvasive biomarkers not used.                                                                                                                                                                                                                                                                                                                   | No                             |

Supplementary Table 1. Continued

| Drug             | Study                                | Noninvasive biomarkers used              | Fibrosis changes reported by study                                                                                                                                                | Brief summary                                                                                                                                                                                                       | Included for review in Table 3 |
|------------------|--------------------------------------|------------------------------------------|-----------------------------------------------------------------------------------------------------------------------------------------------------------------------------------|---------------------------------------------------------------------------------------------------------------------------------------------------------------------------------------------------------------------|--------------------------------|
| Obeticholic acid | Younossi et al. <sup>14</sup> (2019) |                                          | Obeticholic acid significantly improved fibrosis.                                                                                                                                 | Noninvasive biomarkers not used (ALT and AST only).                                                                                                                                                                 | No                             |
| Pioglitazone     | Sanyal et al. <sup>15</sup> (2010)   |                                          | Fibrosis scores were not significantly improved.                                                                                                                                  | Noninvasive biomarkers not used.                                                                                                                                                                                    | No                             |
| Pioglitazone     | Cusi et al. <sup>16</sup> (2016)     |                                          | Pioglitazone treatment was associated with improvement in individual histologic scores, including the fibrosis score (treatment difference, -0.5 [95% CI, -0.9 to 0.0]; P=0.039). | Noninvasive biomarkers not used.                                                                                                                                                                                    | No                             |
| Resmetirom       | Harrison et al. <sup>17</sup> (2019) | ELF™, PRO-C3                             | Biomarkers of hepatic fibrogenesis (PRO-C3 and ELF™) were reduced.                                                                                                                | Cohorts included F0, F1 and F2. ELF™ is currently only validated for ≥F3. The changes observed to ELF™ scores may not necessarily be an accurate representation to the changes in liver observed in histopathology. | Yes                            |
| Seladelpar       | Harrison et al. <sup>18</sup> (2020) |                                          | No significant decrease in fibrosis                                                                                                                                               | Conference report and poster presentation only.                                                                                                                                                                     | No                             |
| Selonsertib      | Loomba et al. <sup>19</sup> (2018)   | ELF™, FibroTest®, VCTE                   | Improvement in fibrosis was associated with reduction in collagen content and lobular inflammation on liver biopsy as well as improvements in serum biomarkers.                   | Cohort included F3, therefore appropriate use of noninvasive biomarkers. Difference between baseline and follow up for biomarkers recorded only.                                                                    | Yes                            |
| Selonsertib      | Harrison et al. <sup>20</sup> (2020) | ELF™, FibroTest®, APRI, FIB-4, NFS, VCTE | Selonsertib did not reduce fibrosis.                                                                                                                                              | Cohort was F4, therefore appropriate use of noninvasive biomarkers.                                                                                                                                                 | Yes                            |
| Semaqlutide      | Newsome et al. <sup>21</sup> (2021)  | ELF™, VCTE                               | The trial did not show a significant between-group difference in the percentage of patients with an improvement in fibrosis stage.                                                | Cohort included F1 and F2. ELF™ is currently only validated for ≥F3. The changes observed to ELF™ scores may not necessarily be an accurate representation to the changes in liver observed in histopathology.      | Yes                            |

NAFLD, non-alcoholic fatty liver disease; ELF™, enhanced liver fibrosis; FIB-4, fibrosis-4; PRO-C3, Type III collagen marker of the N-terminal pro-peptide; NFS, NAFLD fibrosis score; VCTE, vibration controlled transient elastography; APRI, aspartate transaminase to platelet ratio index; NASH, nonalcoholic steohepatitis; AST, aspartate transaminase; ALT, alanine transaminase; CI, confidence interval.

## REFERENCES (Supplementary Table 1)

1. Harrison SA, Neff G, Guy CD, Bashir MR, Paredes AH, Frias JP, et al. Efficacy and safety of aldafermin, an engineered FGF19 analog, in a randomized, double-blind, placebo-controlled trial of patients with nonalcoholic steatohepatitis. *Gastroenterology* 2021;160:219-231.e1.
2. Ratziu V, de Guevara L, Safadi R, Poordad F, Fuster F, Flores-Figueroa J, et al. One-year results of the global phase 2b randomized placebo-controlled ARREST trial of aramchol, a stearyl CoA desaturasemodulator in NASH patients. *The Liver Meeting 2018*; 2018 Nov 9-13; San Francisco, CA.
3. Chalasani N, Abdelmalek MF, Garcia-Tsao G, Vuppalanchi R, Alkhouri N, Rinella M, et al. Effects of belaepectin, an inhibitor of galectin-3, in patients with nonalcoholic steatohepatitis with cirrhosis and portal hypertension. *Gastroenterology* 2020;158:1334-1345.e5.
4. Friedman SL, Ratziu V, Harrison SA, Abdelmalek MF, Aithal GP, Caballeria J, et al. A randomized, placebo-controlled trial of cenicriviroc for treatment of nonalcoholic steatohepatitis with fibrosis. *Hepatology* 2018;67:1754-1767.
5. Loomba R, Nouredin M, Kowdley KV, Kohli A, Sheikh A, Neff G, et al. Combination therapies including Cilofexor and Firsocostat for bridging fibrosis and cirrhosis attributable to NASH. *Hepatology* 2021;73:625-643.
6. Harrison SA, Ruane PJ, Freilich BL, Neff G, Patil R, Behling CA, et al. Efruxifermin in non-alcoholic steatohepatitis: a randomized, double-blind, placebo-controlled, phase 2a trial. *Nat Med* 2021;27:1262-1271.
7. Ratziu V, Harrison SA, Francque S, Bedossa P, Lehert P, Serfaty L, et al. Elafibranor, an agonist of the peroxisome proliferator-activated receptor- $\alpha$  and - $\delta$ , induces resolution of nonalcoholic steatohepatitis without fibrosis worsening. *Gastroenterology* 2016;150:1147-1159.e5.
8. Harrison SA, Ratziu V, Bedossa P, Dufour JF, Kruger F, Schattenberg M, et al. RESOLVE-IT phase 3 of elafibranor in NASH: final results of the week 72 interim surrogate efficacy analysis. *The Liver Meeting Digital Experience 2020*; 2020 Nov 11-16.
9. Harrison SA, Goodman Z, Jabbar A, Vemulapalli R, Younes ZH, Freilich B, et al. A randomized, placebo-controlled trial of emricasan in patients with NASH and F1-F3 fibrosis. *J Hepatol* 2020;72:816-827.
10. Francque SM, Bedossa P, Ratziu V, Anstee QM, Bugianesi E, Sanyal AJ, et al. A randomized, controlled trial of the Pan-PPAR agonist lanifibranor in NASH. *N Engl J Med* 2021;385:1547-1558.
11. Armstrong MJ, Gaunt P, Aithal GP, Barton D, Hull D, Parker R, et al. Liraglutide safety and efficacy in patients with non-alcoholic steatohepatitis (LEAN): a multicentre, double-blind, randomised, placebo-controlled phase 2 study. *Lancet* 2016;387:679-690.
12. Harrison SA, Alkhouri N, Davison BA, Sanyal A, Edwards C, Colca JR, et al. Insulin sensitizer MSDC-0602K in non-alcoholic steatohepatitis: a randomized, double-blind, placebo-controlled phase IIb study. *J Hepatol* 2020;72:613-626.
13. Neuschwander-Tetri BA, Loomba R, Sanyal AJ, Lavine JE, Van Natta ML, Abdelmalek MF, et al. Farnesoid X nuclear receptor ligand obeticholic acid for non-cirrhotic, non-alcoholic steatohepatitis (FLINT): a multicentre, randomised, placebo-controlled trial. *Lancet* 2015;385:956-965.
14. Younossi ZM, Ratziu V, Loomba R, Rinella M, Anstee QM, Goodman Z, et al. Obeticholic acid for the treatment of non-alcoholic steatohepatitis: interim analysis from a multicentre, randomised, placebo-controlled phase 3 trial. *Lancet* 2019;394:2184-2196.
15. Sanyal AJ, Chalasani N, Kowdley KV, McCullough A, Diehl AM, Bass NM, et al.; NASH CRN. Pioglitazone, vitamin E, or placebo for nonalcoholic steatohepatitis. *N Engl J Med* 2010;362:1675-1685.
16. Cusi K, Orsak B, Bril F, Lomonaco R, Hecht J, Ortiz-Lopez C, et al. Long-term pioglitazone treatment for patients with nonalcoholic steatohepatitis and prediabetes or type 2 diabetes mellitus: a randomized trial. *Ann Intern Med* 2016;165:305-315.
17. Harrison SA, Bashir MR, Guy CD, Zhou R, Moylan CA, Frias JP, et al. Resmetirom (MGL-3196) for the treatment of non-alcoholic steatohepatitis: a multicentre, randomised, double-blind, placebo-controlled, phase 2 trial. *Lancet* 2019;394:2012-2024.
18. Harrison SA, Gunn NT, Khazanchi A, Guy CD, Brunt EM, Moussa S, et al. A 52-week multi-center double-blind randomized phase 2 study of seladelpar, a potent and selective peroxisome proliferator-activated receptor delta (PPAR-delta) agonist, in patients with nonalcoholic steatohepatitis (NASH). *The Liver Meeting Digital Experience 2020*; 2020 Nov 11-16.
19. Loomba R, Lawitz E, Mantry PS, Jayakumar S, Caldwell SH, Arnold H, et al. The ASK1 inhibitor selonsertib in patients with nonalcoholic steatohepatitis: a randomized, phase 2 trial. *Hepatology* 2018;67:549-559.
20. Harrison SA, Wong VW, Okanoue T, Bzowej N, Vuppalanchi R, Younes Z, et al. Selonsertib for patients with bridging fibrosis or compensated cirrhosis due to NASH: results from randomized phase III STELLAR trials. *J Hepatol* 2020;73:26-39.

21. Newsome PN, Buchholtz K, Cusi K, Linder M, Okanoue T, Ratziu V, et al. A placebo-controlled trial of subcutaneous semaglutide in nonalcoholic steatohepatitis. *N Engl J Med* 2021;384:1113-1124.
22. Ampuero J, Gallego-Durán R, Maya-Miles D, Montero R, Gato S,

Rojas Á, et al. Systematic review and meta-analysis: analysis of variables influencing the interpretation of clinical trial results in NAFLD. *J Gastroenterol* 2022;57:357-371.
