# Supplementary material for: Noninvasive serum biomarkers for liver fibrosis in NAFLD: current and future
Source: PubMed Central journal article supplement — Clin Mol Hepatol. 2022 Nov 22;29(Suppl):S157–70. doi: 10.3350/cmh.2022.0348 (PMC10029954; doi:10.3350/cmh.2022.0348), 2022-11-22
Supplement: cmh-2022-0348-Supplementary-Table-2.pdf [file cmh-2022-0348-Supplementary-Table-2.pdf]

**Supplementary Table 2.** Comparison between change in noninvasive serum biomarkers and change in liver fibrosis assessed by liver histology, in therapeutic trials of nonalcoholic steatohepatitis (NASH)

| Study                                    | Study design, duration & numbers recruited                             | Relevant drug for NASH | Patient group      | Fibrosis marker                          | Fibrosis stage     | Baseline   | Follow-up         | Change in mean | Change in serum biomarker score |
|------------------------------------------|------------------------------------------------------------------------|------------------------|--------------------|------------------------------------------|--------------------|------------|-------------------|----------------|---------------------------------|
| Newsome et al. <sup>1</sup> (2021)       | Phase 2, double-blind, randomised, placebo-controlled; 72 weeks; n=320 | Semaglutide            | 0.1 mg             | Biopsy confirmed fibrosis using NASH     | F0                 | n=0        | n=13 (16%)        |                |                                 |
|                                          |                                                                        |                        |                    | CRN criteria                             | F1                 | n=23 (29%) | n=22 (28%)        |                |                                 |
|                                          |                                                                        |                        |                    |                                          | F2                 | n=18 (22%) | n=19 (24%)        |                |                                 |
|                                          |                                                                        |                        |                    |                                          | F3                 | n=39 (49%) | n=18 (23%)        |                |                                 |
|                                          |                                                                        |                        |                    |                                          | F4                 | n=0        | n=2 (3%)          |                |                                 |
|                                          |                                                                        |                        |                    | Mean fibrosis stage <sup>a</sup> (SD)    |                    | 2.2 (0.6)  | 1.6 (0.3)         | -0.6           | -0.34 <sup>a</sup>              |
|                                          |                                                                        |                        |                    | Mean ELF <sup>™</sup> score <sup>h</sup> |                    | 9.8±1.0    | 9.42 <sup>d</sup> |                | -2.0 <sup>d</sup>               |
|                                          |                                                                        |                        |                    | Mean VCTE reading, kPa <sup>g</sup>      |                    | 10.4±78.5  | 8.04 <sup>i</sup> |                |                                 |
|                                          |                                                                        |                        |                    | Biopsy confirmed fibrosis using NASH     | F0                 | n=0        | n=9 (14%)         |                |                                 |
|                                          |                                                                        |                        |                    | CRN criteria                             | F1                 | n=19 (26%) | n=19 (30%)        |                |                                 |
|                                          |                                                                        |                        |                    |                                          | F2                 | n=18 (24%) | n=11 (17%)        |                |                                 |
|                                          |                                                                        |                        |                    |                                          | F3                 | n=41 (55%) | n=23 (36%)        |                |                                 |
|                                          |                                                                        |                        |                    |                                          | F4                 | n=0        | n=2 (3%)          |                |                                 |
|                                          |                                                                        |                        |                    | Mean fibrosis stage <sup>a</sup> (SD)    |                    | 2.3 (0.7)  | 1.8 (0.4)         | -0.5           | -0.39 <sup>a</sup>              |
|                                          |                                                                        |                        |                    | Mean ELF <sup>™</sup> score <sup>h</sup> |                    | 9.8±0.9    | 9.37 <sup>d</sup> |                | -4.75 <sup>d</sup>              |
| Mean VCTE reading, kPa <sup>g</sup>      |                                                                        | 12.3±74.0              | 7.55 <sup>i</sup>  |                                          |                    |            |                   |                |                                 |
| Biopsy confirmed fibrosis using NASH     | F0                                                                     | n=0                    | n=11 (16%)         |                                          |                    |            |                   |                |                                 |
| CRN criteria                             | F1                                                                     | n=26 (32%)             | n=21 (30%)         |                                          |                    |            |                   |                |                                 |
|                                          | F2                                                                     | n=14 (17%)             | n=17 (25%)         |                                          |                    |            |                   |                |                                 |
|                                          | F3                                                                     | n=42 (51%)             | n=20 (29%)         |                                          |                    |            |                   |                |                                 |
|                                          | F4                                                                     | n=0                    | n=0                |                                          |                    |            |                   |                |                                 |
| Mean fibrosis stage <sup>a</sup>         |                                                                        | 2.2 (0.6)              | 1.7 (0.4)          | -0.5                                     | -0.56 <sup>a</sup> |            |                   |                |                                 |
| Mean ELF <sup>™</sup> score <sup>h</sup> |                                                                        | 9.9±1.0                | 9.2 <sup>d</sup>   |                                          | -3.82              |            |                   |                |                                 |
| Mean VCTE reading, kPa <sup>g</sup>      |                                                                        | 11.5±87.1              | 7.68 <sup>i</sup>  |                                          |                    |            |                   |                |                                 |
| Biopsy confirmed fibrosis using NASH     | F0                                                                     | n=0                    | n=8 (11%)          |                                          |                    |            |                   |                |                                 |
| CRN criteria                             | F1                                                                     | n=22 (28%)             | n=17 (24%)         |                                          |                    |            |                   |                |                                 |
|                                          | F2                                                                     | n=22 (28%)             | n=16 (23%)         |                                          |                    |            |                   |                |                                 |
|                                          | F3                                                                     | n=36 (45%)             | n=26 (37%)         |                                          |                    |            |                   |                |                                 |
|                                          | F4                                                                     | n=0                    | n=3 (4%)           |                                          |                    |            |                   |                |                                 |
| Mean fibrosis stage <sup>a</sup> (SD)    |                                                                        | 2.2 (0.6)              | 2.0 (0.4)          | -0.2                                     | 0.01 <sup>e</sup>  |            |                   |                |                                 |
| Mean ELF <sup>™</sup> score <sup>h</sup> |                                                                        | 9.6±0.9                | 9.77 <sup>d</sup>  |                                          | 2.14 <sup>d</sup>  |            |                   |                |                                 |
| Mean VCTE reading, kPa <sup>g</sup>      |                                                                        | 8.7±90.0               | 10.84 <sup>i</sup> |                                          |                    |            |                   |                |                                 |

Supplementary Table 2. Continued

| Study                                                | Study design, duration & numbers recruited                              | Relevant drug for NASH | Patient group                        | Fibrosis marker                                      | Fibrosis stage       | Baseline             | Follow-up            | Change in mean      | Change in serum biomarker score |
|------------------------------------------------------|-------------------------------------------------------------------------|------------------------|--------------------------------------|------------------------------------------------------|----------------------|----------------------|----------------------|---------------------|---------------------------------|
| Friedman et al. <sup>2</sup> (2018)                  | Phase 2b, double-blind, randomised, placebo-controlled; 52 weeks; n=288 | Cenicriviroc           | 150 mg                               | Biopsy confirmed fibrosis using NASH                 | F0                   | n=0                  | n=10 (7%)            |                     |                                 |
|                                                      |                                                                         |                        |                                      | CRN criteria                                         | F1                   | n=47 (32%)           | n=44 (32%)           |                     |                                 |
|                                                      |                                                                         |                        |                                      |                                                      | F2                   | n=42 (29%)           | n=35 (25%)           |                     |                                 |
|                                                      |                                                                         |                        |                                      |                                                      | F3                   | n=56 (39%)           | n=47 (34%)           |                     |                                 |
|                                                      |                                                                         |                        |                                      |                                                      | F4                   | n=0                  | n=2 (1%)             |                     |                                 |
|                                                      |                                                                         |                        |                                      | Mean fibrosis stage (SD)                             |                      | 2.1 (0.5)            | 1.9 (0.4)            | -0.2                |                                 |
|                                                      |                                                                         |                        |                                      | Median NFS score (min, max)                          |                      | -0.942 (-4.55, 1.27) | -0.942 (-4.55, 1.27) |                     | -0.942 (-4.55, 1.27)            |
|                                                      |                                                                         |                        |                                      | Mean NFS score for subjects with improvement (SD)    |                      | -1.28 (1.24)         | -1.24 (1.21)         |                     | 0.05 (0.52)                     |
|                                                      |                                                                         |                        |                                      | Mean NFS score for subjects without improvement (SD) |                      | -0.99 (1.09)         | -0.80 (1.21)         |                     | 0.19 (0.49)                     |
|                                                      |                                                                         |                        |                                      | Median FIB-4 score (min, max)                        |                      | 1.239 (0.38, 4.20)   | 1.375 (0.42, 5.26)   |                     | 0.080 (-1.81, 2.38)             |
|                                                      |                                                                         |                        |                                      | Mean FIB-4 for subjects with improvement (SD)        |                      | 1.27 (0.59)          | 1.29 (0.63)          |                     | 0.02 (0.41)                     |
|                                                      |                                                                         |                        |                                      | Mean FIB-4 for subjects without improvement (SD)     |                      | 1.44 (0.72)          | 1.61 (0.82)          |                     | 0.16 (0.54)                     |
|                                                      |                                                                         |                        |                                      | Median APRI score (min, max)                         |                      | 0.470 (0.20, 3.12)   | 0.539 (0.15, 3.45)   |                     | 0.024 (-1.30, 1.49)             |
|                                                      |                                                                         |                        |                                      | Mean APRI for subjects with improvement (SD)         |                      | 0.52 (0.29)          | 0.57 (0.49)          |                     | 0.05 (0.41)                     |
|                                                      |                                                                         |                        |                                      | Mean APRI for subjects without improvement (SD)      |                      | 0.61 (0.43)          | 0.72 (0.50)          |                     | 0.11 (0.38)                     |
|                                                      |                                                                         |                        |                                      | Median ELF* (min, max)                               |                      | -0.892 (-2.70, 1.27) | -0.828 (-2.50, 1.08) |                     | 0.023 (-1.98, 1.65)             |
|                                                      |                                                                         |                        |                                      | Mean ELF* for subjects with improvement (SD)         |                      | -1.06 (0.65)         | -1.10 (0.60)         |                     | -0.04 (0.66)                    |
| Mean ELF** for subjects without improvement (SD)     |                                                                         | -0.72 (0.73)           | -0.66 (0.76)                         |                                                      | 0.06 (0.53)          |                      |                      |                     |                                 |
| Placebo                                              |                                                                         |                        | Biopsy confirmed fibrosis using NASH | F0                                                   | n=0                  | n=5 (4%)             |                      |                     |                                 |
|                                                      |                                                                         |                        | CRN criteria                         | F1                                                   | n=48 (35%)           | n=42 (31%)           |                      |                     |                                 |
|                                                      |                                                                         |                        |                                      | F2                                                   | n=40 (28%)           | n=34 (25%)           |                      |                     |                                 |
|                                                      |                                                                         |                        |                                      | F3                                                   | n=50 (38%)           | n=50 (37%)           |                      |                     |                                 |
|                                                      |                                                                         |                        |                                      | F4                                                   | n=0                  | n=5 (4%)             |                      |                     |                                 |
|                                                      |                                                                         |                        | Mean fibrosis score (SD)             |                                                      | 2.0 (0.5)            | 2.1 (0.4)            | 0.1                  |                     |                                 |
|                                                      |                                                                         |                        | Median NFS score (min, max)          |                                                      | -1.223 (-4.81, 2.46) | -1.190 (-4.27, 2.34) |                      | 0.102 (-1.74, 1.37) |                                 |
| Mean NFS score for subjects with improvement (SD)    |                                                                         | -1.26 (1.46)           | -1.24 (1.61)                         |                                                      | 0.02 (0.64)          |                      |                      |                     |                                 |
| Mean NFS score for subjects without improvement (SD) |                                                                         | -1.13 (1.48)           | -0.99 (1.41)                         |                                                      | 0.15 (0.48)          |                      |                      |                     |                                 |

Supplementary Table 2. Continued

| Study                                   | Study design, duration & numbers recruited                              | Relevant drug for NASH | Patient group | Fibrosis marker                                  | Fibrosis stage       | Baseline | Follow-up              | Change in mean | Change in serum biomarker score |  |                        |
|-----------------------------------------|-------------------------------------------------------------------------|------------------------|---------------|--------------------------------------------------|----------------------|----------|------------------------|----------------|---------------------------------|--|------------------------|
| Francque et al. <sup>3</sup> (2021)     | Phase 2b, double-blind, randomised, placebo-controlled; 24 weeks; n=247 | Lanifibranor           | 800 mg        | Median FIB-4 score (min, max)                    | 1.303 (0.40, 4.14)   |          | 1.242 (0.36, 5.32)     |                | 0.006 (-1.18, 3.11)             |  |                        |
|                                         |                                                                         |                        |               | Mean FIB-4 for subjects with improvement (SD)    | 1.31 (0.63)          |          | 1.17 (0.60)            |                | -0.14 (0.49)                    |  |                        |
|                                         |                                                                         |                        |               | Mean FIB-4 for subjects without improvement (SD) | 1.55 (0.76)          |          | 1.55 (0.76)            |                | 0.17 (0.73)                     |  |                        |
|                                         |                                                                         |                        |               | Median APRI score (min, max)                     | 0.568 (0.15, 2.26)   |          | 0.538 (0.13, 3.71)     |                | -0.031 (-0.82, 3.46)            |  |                        |
|                                         |                                                                         |                        |               | Mean APRI for subjects with improvement (SD)     | 0.51 (0.26)          |          | 0.42 (0.26)            |                | -0.09 (0.26)                    |  |                        |
|                                         |                                                                         |                        |               | Mean APRI for subjects without improvement (SD)  | 0.70 (0.41)          |          | 0.81 (0.71)            |                | 0.11 (0.61)                     |  |                        |
|                                         |                                                                         |                        |               | Median ELF™ score (min, max)                     | -0.893 (-2.20, 1.62) |          | -1.003 (-2.53, 2.07)   |                | -0.113 (-1.21, 1.60)            |  |                        |
|                                         |                                                                         |                        |               | Mean ELF™ for subjects with improvement (SD)     | -1.10 (0.73)         |          | -1.12 (0.68)           |                | -0.02 (0.44)                    |  |                        |
|                                         |                                                                         |                        |               | Mean ELF™ for subjects without improvement (SD)  | -0.74 (0.73)         |          | -0.81 (0.84)           |                | -0.08 (0.59)                    |  |                        |
|                                         |                                                                         |                        |               | Mean fibrosis score (SD) <sup>(i)</sup>          | 2.1±0.8              |          | NR                     | NR             | NR                              |  |                        |
|                                         |                                                                         |                        |               | Median ELF™ score <sup>(i)</sup> (IQR)           | NR                   |          | NR                     | NR             | NR                              |  | -0.19 (-0.35 to -0.04) |
|                                         |                                                                         |                        |               | Median FIB-4 <sup>(i)</sup> (IQR)                | NR                   |          | NR                     | NR             | NR                              |  | 0 (-0.17 to 0.16)      |
|                                         |                                                                         |                        |               | Median PRO-C3, µg/L (IQR)                        | NR                   |          | NR                     | NR             | NR                              |  | -3.93 (-5.26 to -2.61) |
| Mean VCTE reading, kPa (SD)             | 10.31 (4.73)                                                            |                        | NR            | NR                                               | NR                   |          | -1.79 (-3.07 to -0.52) |                |                                 |  |                        |
| Mean fibrosis score (SD) <sup>(i)</sup> | 2.1±0.8                                                                 |                        | 1,200 mg      | Mean fibrosis score (SD) <sup>(i)</sup>          | 2.1±0.8              |          | NR                     | NR             |                                 |  |                        |
| Median ELF™ score <sup>(i)</sup> (IQR)  | NR                                                                      |                        |               | Median ELF™ score <sup>(i)</sup> (IQR)           | NR                   |          | NR                     | NR             |                                 |  |                        |
| Median FIB-4 <sup>(i)</sup> (IQR)       | NR                                                                      |                        |               | Median FIB-4 <sup>(i)</sup> (IQR)                | NR                   |          | NR                     | NR             |                                 |  |                        |
| Median PRO-C3, µg/L (IQR)               | NR                                                                      |                        |               | Median PRO-C3, µg/L (IQR)                        | NR                   |          | NR                     | NR             |                                 |  |                        |
| Mean VCTE reading, kPa (SD)             | 9.99 (5.46)                                                             |                        |               | Mean VCTE reading, kPa (SD)                      | 9.99 (5.46)          |          | NR                     | NR             |                                 |  |                        |
| Mean fibrosis score (SD) <sup>(i)</sup> | 2.0±0.8                                                                 |                        | Placebo       | Mean fibrosis score (SD) <sup>(i)</sup>          | 2.0±0.8              |          | NR                     | NR             |                                 |  |                        |
| Median ELF™ score <sup>(i)</sup> (IQR)  | NR                                                                      |                        |               | Median ELF™ score <sup>(i)</sup> (IQR)           | NR                   |          | NR                     | NR             |                                 |  |                        |
| Median FIB-4 <sup>(i)</sup> (IQR)       | NR                                                                      |                        |               | Median FIB-4 <sup>(i)</sup> (IQR)                | NR                   |          | NR                     | NR             |                                 |  |                        |
| Median PRO-C3, µg/L (IQR)               | NR                                                                      |                        |               | Median PRO-C3, µg/L (IQR)                        | NR                   |          | NR                     | NR             |                                 |  |                        |
| Mean VCTE reading, kPa (SD)             | 9.96 (4.89)                                                             |                        |               | Mean VCTE reading, kPa (SD)                      | 9.96 (4.89)          |          | NR                     | NR             |                                 |  |                        |

Supplementary Table 2. Continued

| Study                               | Study design, duration & numbers recruited                              | Relevant drug for NASH | Patient group                        | Fibrosis marker                      | Fibrosis stage | Baseline     | Follow-up      | Change in mean | Change in serum biomarker score                                                                                                                                                                                                                                                                                                                                                                          |
|-------------------------------------|-------------------------------------------------------------------------|------------------------|--------------------------------------|--------------------------------------|----------------|--------------|----------------|----------------|----------------------------------------------------------------------------------------------------------------------------------------------------------------------------------------------------------------------------------------------------------------------------------------------------------------------------------------------------------------------------------------------------------|
| Harrison et al. <sup>4</sup> (2020) | Phase 2b, double-blind, randomised, placebo-controlled; 52 weeks; n=392 | MSDC-0602K             | 62.5 mg                              | Biopsy confirmed fibrosis using NASH | F0             | n=0          | NR             |                | Follow-up data was not recorded in the supplementary information. In the report the following information was provided regarding the performance of noninvasive biomarkers: The average effect of the combined highest doses relative to placebo on ELF™, FIB-4, FibroTest®, and CK-18 was a reduction of 0.21 (95% CI -0.39 to -0.03) SDs at 6 months and 0.17 (95% CI -0.37 to 0.02) SDs at 12 months. |
|                                     |                                                                         |                        |                                      | CRN criteria                         | F1             | n=37 (37.4%) | NR             |                |                                                                                                                                                                                                                                                                                                                                                                                                          |
|                                     |                                                                         |                        |                                      |                                      | F2             | n=16 (16.2%) | NR             |                |                                                                                                                                                                                                                                                                                                                                                                                                          |
|                                     |                                                                         |                        |                                      |                                      | F3             | n=47 (46.5%) | NR             |                |                                                                                                                                                                                                                                                                                                                                                                                                          |
|                                     |                                                                         |                        |                                      |                                      | F4             | n=0          | NR             |                |                                                                                                                                                                                                                                                                                                                                                                                                          |
|                                     |                                                                         |                        |                                      |                                      |                |              | 0.1            |                |                                                                                                                                                                                                                                                                                                                                                                                                          |
|                                     |                                                                         |                        |                                      |                                      |                |              | 2.12 (0.59)    | NR             |                                                                                                                                                                                                                                                                                                                                                                                                          |
|                                     |                                                                         |                        |                                      |                                      |                |              | 0.581 (0.3253) | NR             |                                                                                                                                                                                                                                                                                                                                                                                                          |
|                                     |                                                                         |                        |                                      |                                      |                |              | 9.83 (0.986)   | NR             |                                                                                                                                                                                                                                                                                                                                                                                                          |
|                                     |                                                                         |                        |                                      |                                      |                |              | 1.54 (0.686)   | NR             |                                                                                                                                                                                                                                                                                                                                                                                                          |
|                                     |                                                                         |                        |                                      |                                      |                | 0.31 (0.226) | NR             |                |                                                                                                                                                                                                                                                                                                                                                                                                          |
|                                     |                                                                         | 125 mg                 | Biopsy confirmed fibrosis using NASH | F0                                   | n=0            | NR           |                |                |                                                                                                                                                                                                                                                                                                                                                                                                          |
|                                     |                                                                         |                        | CRN criteria                         | F1                                   | n=37 (36.7%)   | NR           |                |                |                                                                                                                                                                                                                                                                                                                                                                                                          |
|                                     |                                                                         |                        |                                      | F2                                   | n=16 (16.3%)   | NR           |                |                |                                                                                                                                                                                                                                                                                                                                                                                                          |
|                                     |                                                                         |                        |                                      | F3                                   | n=47 (45.9%)   | NR           |                |                |                                                                                                                                                                                                                                                                                                                                                                                                          |
|                                     |                                                                         |                        |                                      | F4                                   | n=0            | NR           |                |                |                                                                                                                                                                                                                                                                                                                                                                                                          |
|                                     |                                                                         |                        |                                      |                                      |                |              | -0.1           |                |                                                                                                                                                                                                                                                                                                                                                                                                          |
|                                     |                                                                         |                        |                                      |                                      |                |              | 2.14 (0.59)    | NR             |                                                                                                                                                                                                                                                                                                                                                                                                          |
|                                     |                                                                         |                        |                                      |                                      |                |              | 0.516 (0.2331) | NR             |                                                                                                                                                                                                                                                                                                                                                                                                          |
|                                     |                                                                         |                        |                                      |                                      |                |              | 9.74 (0.953)   | NR             |                                                                                                                                                                                                                                                                                                                                                                                                          |
|                                     |                                                                         |                        |                                      |                                      | 1.49 (0.755)   | NR           |                |                |                                                                                                                                                                                                                                                                                                                                                                                                          |
| 250 mg                              | Biopsy confirmed fibrosis using NASH                                    | F0                     | n=0                                  | NR                                   |                |              |                |                |                                                                                                                                                                                                                                                                                                                                                                                                          |
|                                     | CRN criteria                                                            | F1                     | n=40 (40.6%)                         | NR                                   |                |              |                |                |                                                                                                                                                                                                                                                                                                                                                                                                          |
|                                     |                                                                         | F2                     | n=16 (15.8%)                         | NR                                   |                |              |                |                |                                                                                                                                                                                                                                                                                                                                                                                                          |
|                                     |                                                                         | F3                     | n=44 (43.6%)                         | NR                                   |                |              |                |                |                                                                                                                                                                                                                                                                                                                                                                                                          |
|                                     |                                                                         | F4                     | n=0                                  | NR                                   |                |              |                |                |                                                                                                                                                                                                                                                                                                                                                                                                          |
|                                     |                                                                         |                        |                                      |                                      | -0.1           |              |                |                |                                                                                                                                                                                                                                                                                                                                                                                                          |
|                                     |                                                                         |                        |                                      |                                      | 2.10 (0.53)    | NR           |                |                |                                                                                                                                                                                                                                                                                                                                                                                                          |
|                                     |                                                                         |                        |                                      |                                      | 0.604 (0.4385) | NR           |                |                |                                                                                                                                                                                                                                                                                                                                                                                                          |
|                                     |                                                                         |                        |                                      |                                      | 9.80 (1.052)   | NR           |                |                |                                                                                                                                                                                                                                                                                                                                                                                                          |
|                                     |                                                                         |                        |                                      |                                      | 1.58 (0.909)   | NR           |                |                |                                                                                                                                                                                                                                                                                                                                                                                                          |
| Placebo                             | Biopsy confirmed fibrosis using NASH                                    | F0                     | n=0                                  | NR                                   |                |              |                |                |                                                                                                                                                                                                                                                                                                                                                                                                          |
|                                     | CRN criteria                                                            | F1                     | n=36 (38.3%)                         | NR                                   |                |              |                |                |                                                                                                                                                                                                                                                                                                                                                                                                          |
|                                     |                                                                         | F2                     | n=15 (16.0%)                         | NR                                   |                |              |                |                |                                                                                                                                                                                                                                                                                                                                                                                                          |
|                                     |                                                                         | F3                     | n=43 (45.7%)                         | NR                                   |                |              |                |                |                                                                                                                                                                                                                                                                                                                                                                                                          |
|                                     |                                                                         | F4                     | n=0                                  | NR                                   |                |              |                |                |                                                                                                                                                                                                                                                                                                                                                                                                          |
|                                     |                                                                         |                        |                                      |                                      | 0.1            |              |                |                |                                                                                                                                                                                                                                                                                                                                                                                                          |
|                                     |                                                                         |                        |                                      |                                      | 2.2 (0.6)      | NR           |                |                |                                                                                                                                                                                                                                                                                                                                                                                                          |
|                                     |                                                                         |                        |                                      |                                      | 0.540 (0.2896) | NR           |                |                |                                                                                                                                                                                                                                                                                                                                                                                                          |
|                                     |                                                                         |                        |                                      |                                      | 9.6 (0.850)    | NR           |                |                |                                                                                                                                                                                                                                                                                                                                                                                                          |
|                                     |                                                                         |                        |                                      |                                      | 1.38 (0.688)   | NR           |                |                |                                                                                                                                                                                                                                                                                                                                                                                                          |
|                                     |                                                                         |                        |                                      | 0.31 (0.197)                         | NR             |              |                |                |                                                                                                                                                                                                                                                                                                                                                                                                          |

Supplementary Table 2. Continued

| Study                                             | Study design, duration & numbers recruited                              | Relevant drug for NASH | Patient group | Fibrosis marker                                               | Fibrosis stage                                                        | Baseline         | Follow-up                 | Change in mean            | Change in serum biomarker score |
|---------------------------------------------------|-------------------------------------------------------------------------|------------------------|---------------|---------------------------------------------------------------|-----------------------------------------------------------------------|------------------|---------------------------|---------------------------|---------------------------------|
| Armstrong et al. <sup>5</sup> (2016)              | Phase 2, double-blind, randomised, placebo-controlled; 48 weeks; n=52   | Liraclutide            | 1.8 mg        | Biopsy confirmed fibrosis stages using Kleiner scoring system | F0–F2                                                                 | n=14 (54%)       | NR                        |                           |                                 |
|                                                   |                                                                         |                        |               | Mean fibrosis stage (SD)                                      | F3–F4                                                                 | n=12 (46%)       | NR                        |                           |                                 |
|                                                   |                                                                         |                        |               | Mean ELF™ score (SD)                                          |                                                                       | 2.3 (0.9)        | NR                        | -0.2 (0.8)                |                                 |
|                                                   |                                                                         |                        |               | Biopsy confirmed fibrosis stages using Kleiner scoring system | F0–F2                                                                 | 9.3 (SD)         | NR                        |                           | -0.3 (0.8)                      |
|                                                   |                                                                         |                        |               | Mean fibrosis stage (SD)                                      | F3–F4                                                                 | n=11 (42%)       | NR                        |                           |                                 |
|                                                   |                                                                         |                        |               | Mean ELF™ score (SD)                                          |                                                                       | n=15 (58%)       | NR                        |                           |                                 |
| Chalasanani et al. <sup>6</sup> (2020)            | Phase 2b, double-blind, randomised, placebo-controlled; 52 weeks; n=162 | Belaepectin            | 2 mg/kg       | Biopsy confirmed cirrhosis using Ishak scoring system         | F3                                                                    | 0                | n=15 <sup>m</sup> (31.5%) |                           |                                 |
|                                                   |                                                                         |                        |               | Mean fibrosis stagea (SD)                                     | F4                                                                    | n=54 (100%)      | n=31 <sup>m</sup> (68.5%) |                           |                                 |
|                                                   |                                                                         |                        |               | Mean ELF™ score (SD)                                          |                                                                       | 4.0 <sup>d</sup> | 3.7 <sup>m</sup> (1.2)    | -0.3 <sup>d</sup>         |                                 |
|                                                   |                                                                         |                        |               | Mean Fibrotect® score (SD)                                    |                                                                       | 10.73 (1.26)     | NR                        |                           | 0.49 (0.83)                     |
|                                                   |                                                                         |                        |               | Mean VCTE reading, kPa (SD)                                   | F3                                                                    | 32.4 (17.7)      | NR                        |                           | 0.02 (0.02)                     |
|                                                   |                                                                         |                        |               | Biopsy confirmed cirrhosis using Ishak scoring system         | F4                                                                    | n=0              | n=10 <sup>m</sup> (24.1%) |                           | -1.3 (12.5)                     |
|                                                   |                                                                         |                        |               | Mean fibrosis stagea (SD)                                     |                                                                       | n=54 (100%)      | n=31 <sup>m</sup> (75.9%) |                           |                                 |
|                                                   |                                                                         |                        |               | Mean ELF™ score (SD)                                          |                                                                       | 4.0 <sup>d</sup> | 3.75 <sup>m</sup> (1.3)   | -0.25 <sup>d</sup>        |                                 |
|                                                   |                                                                         |                        |               | Mean Fibrotect® score (SD)                                    |                                                                       | 10.64 (1.16)     | NR                        |                           | 0.50 (0.78)                     |
|                                                   |                                                                         |                        |               | Mean VCTE reading, kPa (SD)                                   | F3                                                                    | 29.3 (14.9)      | n=12 <sup>m</sup> (1.3)   |                           | 0.01 (0.02)                     |
|                                                   |                                                                         |                        |               | Biopsy confirmed cirrhosis using Ishak scoring system         | F4                                                                    | n=0              | n=33 <sup>m</sup> (74.1%) |                           | -2.34 (10.8)                    |
|                                                   |                                                                         |                        |               | Harrison et al. <sup>7</sup> (2021)                           | Phase 2, double blind, randomised, placebo-controlled; 24 weeks; n=78 | Aldafermin       | 1 mg                      | Mean fibrosis stagea (SD) | F2                              |
| Mean ELF™ score (SD)                              | F3                                                                      | NR                     | NR            |                                                               |                                                                       |                  |                           |                           |                                 |
| Mean Fibrotect® score (SD)                        |                                                                         | NR                     | NR            |                                                               |                                                                       |                  |                           |                           |                                 |
| Mean VCTE reading, kPa (SD)                       |                                                                         | 25.9 (17.8)            | NR            |                                                               |                                                                       |                  |                           |                           | 0.37 (0.63)                     |
| Biopsy confirmed fibrosis using NASH CRN criteria | F2                                                                      | n=29 (55%)             | NR            |                                                               |                                                                       |                  |                           |                           | 0.03 (0.02)                     |
| Mean fibrosis stage (SD)                          | F3                                                                      | n=24 (45%)             | NR            |                                                               |                                                                       |                  |                           |                           | -0.47 (18.6)                    |
| Mean ELF™ score (SD)                              |                                                                         | 2.5 <sup>m</sup> (0.7) | NR            |                                                               |                                                                       |                  |                           |                           |                                 |
| Mean PRO-C3 score, µg/L (SD)                      |                                                                         | 9.8 (0.8)              | NR            |                                                               |                                                                       |                  |                           | NR <sup>m</sup>           | -0.2 (0.5)                      |
| Biopsy confirmed fibrosis using NASH CRN criteria | F2                                                                      | 17.5 (8.4)             | NR            |                                                               |                                                                       |                  |                           |                           | -5.4 (6.2)                      |
| Mean fibrosis stagea (SD)                         | F3                                                                      | n=15 (60%)             | NR            |                                                               |                                                                       |                  |                           |                           |                                 |
| Mean ELF™ score (SD)                              |                                                                         | n=10 (40%)             | NR            |                                                               |                                                                       |                  |                           |                           |                                 |
| Mean PRO-C3 score, µg/L (SD)                      |                                                                         | 2.4 (0.7)              | NR            |                                                               |                                                                       |                  |                           |                           | 0 (0.6)                         |
|                                                   |                                                                         | 9.9 (1.0)              | NR            |                                                               | -1.2 (6.2)                                                            |                  |                           |                           |                                 |
|                                                   |                                                                         | 17.1 (7.0)             | NR            |                                                               |                                                                       |                  |                           |                           |                                 |

Supplementary Table 2. Continued

| Study                               | Study design, duration & numbers recruited                             | Relevant drug for NASH | Patient group | Fibrosis marker                      | Fibrosis stage | Baseline  | Follow-up | Change in mean | Change in serum biomarker score |  |  |
|-------------------------------------|------------------------------------------------------------------------|------------------------|---------------|--------------------------------------|----------------|-----------|-----------|----------------|---------------------------------|--|--|
| Harrison et al. <sup>9</sup> (2021) | Phase 2a, double blind, randomised, placebo-controlled; 12 weeks; n=80 | Erxuxifermin           | 28 mg         | Biopsy confirmed fibrosis using NASH | F1             | n=7 (37%) | NR        |                |                                 |  |  |
|                                     |                                                                        |                        |               | CRN criteria                         | F2             | n=7 (37%) | NR        |                |                                 |  |  |
|                                     |                                                                        |                        |               |                                      | F3             | n=5 (26%) | NR        |                |                                 |  |  |
|                                     |                                                                        |                        |               |                                      |                |           |           |                |                                 |  |  |
|                                     |                                                                        |                        |               |                                      |                |           |           |                |                                 |  |  |
|                                     |                                                                        |                        |               |                                      |                |           |           |                |                                 |  |  |
|                                     |                                                                        |                        |               |                                      |                |           |           |                |                                 |  |  |
|                                     |                                                                        |                        |               |                                      |                |           |           |                |                                 |  |  |
|                                     |                                                                        |                        |               |                                      |                |           |           |                |                                 |  |  |
|                                     |                                                                        |                        |               |                                      |                |           |           |                |                                 |  |  |
|                                     |                                                                        |                        |               |                                      |                |           |           |                |                                 |  |  |
|                                     |                                                                        |                        |               |                                      |                |           |           |                |                                 |  |  |
|                                     |                                                                        |                        |               |                                      |                |           |           |                |                                 |  |  |
|                                     |                                                                        |                        |               |                                      |                |           |           |                |                                 |  |  |
|                                     |                                                                        |                        |               |                                      |                |           |           |                |                                 |  |  |

**Supplementary Table 2.** Continued

| Study                             | Study design, duration & numbers recruited                              | Relevant drug for NASH               | Patient group     | Fibrosis marker                                   | Fibrosis stage | Baseline          | Follow-up              | Change in mean                         | Change in serum biomarker score |
|-----------------------------------|-------------------------------------------------------------------------|--------------------------------------|-------------------|---------------------------------------------------|----------------|-------------------|------------------------|----------------------------------------|---------------------------------|
| Loomba et al. <sup>9</sup> (2021) | Phase 2b, double blind, randomised, placebo-controlled; 48 weeks; n=392 | Clifexor Firsocostat and Selonsertib | Selonsertib 18 mg | Biopsy confirmed fibrosis using NASH CRN criteria | F0-F2          | n=0               | Study arm discontinued |                                        |                                 |
|                                   |                                                                         |                                      |                   | Median ELF™ score (IQR)                           | F3             | n=18 (46%)        |                        |                                        |                                 |
|                                   |                                                                         |                                      |                   | Median VCTE reading, kPa (IQR)                    | F4             | n=21 (54%)        |                        |                                        |                                 |
|                                   |                                                                         |                                      |                   | Biopsy confirmed fibrosis using NASH CRN criteria | F0-F2          | 16.3 (12.3, 23.2) |                        | Data not available to calculate change |                                 |
|                                   |                                                                         |                                      | Firsocostat 20 mg | Median ELF™ score (IQR)                           | F3             | n=16 (40%)        |                        |                                        | -0.1 (-0.4, 0.1)                |
|                                   |                                                                         |                                      |                   | Median VCTE reading, kPa (IQR)                    | F4             | n=22 (55%)        |                        |                                        | -6.3 (-9.6, -3.0)               |
|                                   |                                                                         |                                      | Clifexor 30 mg    | Biopsy confirmed fibrosis using NASH CRN criteria | F0-F2          | 10.2 (9.7, 10.6)  |                        | Data not available to calculate change |                                 |
|                                   |                                                                         |                                      |                   | Median ELF™ score (IQR)                           | F3             | 17.1 (13.2, 22.2) |                        |                                        |                                 |
|                                   |                                                                         |                                      |                   | Median VCTE reading, kPa (IQR)                    | F4             | n=1 (3%)          |                        | Data not available to calculate change |                                 |
|                                   |                                                                         |                                      | Firsocostat 20 mg | Median ELF™ score (IQR)                           | F3             | n=17 (43%)        |                        |                                        |                                 |
|                                   |                                                                         |                                      |                   | Median VCTE reading, kPa (IQR)                    | F4             | n=22 (55%)        |                        |                                        | 0.2 (-0.1, 0.4)                 |
|                                   |                                                                         |                                      | Clifexor 30 mg    | Biopsy confirmed fibrosis using NASH CRN criteria | F0-F2          | 10.1 (9.7, 10.7)  |                        | Data not available to calculate change |                                 |
|                                   |                                                                         |                                      |                   | Median ELF™ score (IQR)                           | F3             | 16.0 (12.8, 21.7) |                        |                                        | -4.3 (-7.5, -1.0)               |
|                                   |                                                                         |                                      |                   | Median VCTE reading, kPa (IQR)                    | F4             | n=1 (1%)          |                        | Data not available to calculate change |                                 |
|                                   |                                                                         |                                      | Selonsertib 18 mg | Median ELF™ score (IQR)                           | F3             | n=32 (42%)        |                        |                                        |                                 |
|                                   |                                                                         |                                      |                   | Median VCTE reading, kPa (IQR)                    | F4             | n=46 (58%)        |                        |                                        | 0.1 (-0.1, 0.20)                |
|                                   |                                                                         |                                      | Clifexor 30 mg    | Biopsy confirmed fibrosis using NASH CRN criteria | F0-F2          | 10.0 (9.4, 10.9)  |                        | Data not available to calculate change |                                 |
|                                   |                                                                         |                                      |                   | Median ELF™ score (IQR)                           | F3             | 16.5 (11.0, 25.1) |                        |                                        | -2.4 (-4.7, -2.0)               |
|                                   |                                                                         |                                      |                   | Median VCTE reading, kPa (IQR)                    | F4             | n=2 (3%)          |                        | Data not available to calculate change |                                 |
|                                   |                                                                         |                                      | Selonsertib 18 mg | Median ELF™ score (IQR)                           | F3             | n=29 (38%)        |                        |                                        |                                 |
|                                   |                                                                         |                                      |                   | Median VCTE reading, kPa (IQR)                    | F4             | n=46 (60%)        |                        |                                        | 0.1 (-0.1, 0.30)                |
|                                   |                                                                         |                                      | Clifexor 30 mg    | Biopsy confirmed fibrosis using NASH CRN criteria | F0-F2          | 10.1 (9.6, 10.8)  |                        | Data not available to calculate change |                                 |
|                                   |                                                                         |                                      |                   | Median ELF™ score (IQR)                           | F3             | 14.9 (10.2, 20.6) |                        |                                        | -3.1 (-5.5, -0.7)               |
|                                   |                                                                         |                                      |                   | Median VCTE reading, kPa (IQR)                    | F4             | n=2 (3%)          |                        | Data not available to calculate change |                                 |
|                                   |                                                                         |                                      | Firsocostat 20 mg | Median ELF™ score (IQR)                           | F3             | n=34 (44%)        |                        |                                        |                                 |
|                                   |                                                                         |                                      |                   | Median VCTE reading, kPa (IQR)                    | F4             | n=42 (54%)        |                        |                                        | -0.0 (-0.2, 0.20)               |
|                                   |                                                                         |                                      | Placebo           | Biopsy confirmed fibrosis using NASH CRN criteria | F0-F2          | 15.7 (10.9, 22.2) |                        | Data not available to calculate change |                                 |
|                                   |                                                                         |                                      |                   | Median ELF™ score (IQR)                           | F3             | n=0               |                        |                                        | -4.2 (-6.5, -1.9)               |
|                                   |                                                                         |                                      |                   | Median VCTE reading, kPa (IQR)                    | F4             | n=17 (44%)        |                        | Data not available to calculate change |                                 |
|                                   |                                                                         |                                      |                   | Median ELF™ score (IQR)                           | F3             | n=22 (56%)        |                        |                                        | 0.3 (0.1, 0.6)                  |
|                                   |                                                                         |                                      |                   | Median VCTE reading, kPa (IQR)                    | F4             | 10.1 (9.2, 11.0)  |                        |                                        | -1.2 (-4.1, 1.8)                |
|                                   |                                                                         |                                      |                   | Biopsy confirmed fibrosis using NASH CRN criteria | F0-F2          | 17.1 (14.3, 23.2) |                        | Data not available to calculate change |                                 |

Supplementary Table 2. Continued

| Study                                   | Study design, duration & numbers recruited                             | Relevant drug for NASH | Patient group       | Fibrosis marker                                                                                                                                                                        | Fibrosis stage                                               | Baseline                                                                                                   | Follow-up                  | Change in mean                                                                                      | Change in serum biomarker score           |
|-----------------------------------------|------------------------------------------------------------------------|------------------------|---------------------|----------------------------------------------------------------------------------------------------------------------------------------------------------------------------------------|--------------------------------------------------------------|------------------------------------------------------------------------------------------------------------|----------------------------|-----------------------------------------------------------------------------------------------------|-------------------------------------------|
| Harrison et al. <sup>10</sup><br>(2019) | Phase 2, double blind, randomised, placebo-controlled; 36 weeks; n=125 | Resmetrirom            | 80 mg               | Biopsy confirmed fibrosis using NASH CRN criteria                                                                                                                                      | F0<br>F1<br>F2<br>F3<br>F4                                   | n=1 (1%)<br>n=47 (56%)<br>n=18 (21%)<br>n=18 (21%)<br>n=0                                                  | NR<br>NR<br>NR<br>NR<br>NR | Reported as Fibrosis responder=28.8%                                                                |                                           |
|                                         |                                                                        |                        |                     | Mean fibrosis stage* (SD)<br>Mean ELF™ score (SD)<br>Mean PRO-C3 score, µg/L (SD)<br>Biopsy confirmed fibrosis using NASH CRN criteria                                                 |                                                              | 1.6 (0.3)<br>9.2 (0.9)<br>17.8 (10.3)<br>n=2 (5%)                                                          | NR<br>NR<br>NR<br>NR       | Reported as Fibrosis responders=16.7%                                                               | -0.38* (0.09)<br>-2.2* (2.1); -6.5* (3.5) |
| Ratzliff et al. <sup>11</sup><br>(2016) | Phase 2, double blind, randomised, placebo-controlled; 52 weeks; n=276 | Elafibranol            | 80 mg<br><br>120 mg | Biopsy confirmed fibrosis using NASH CRN criteria<br><br>Mean fibrosis stage* (SD)<br>Mean NFS score (SD)<br>Mean Fibrotest* (SD)<br>Biopsy confirmed fibrosis using NASH CRN criteria | F0<br>F1<br>F2<br>F3<br>F4<br><br>F0<br>F1<br>F2<br>F3<br>F4 | n=20 (21.5%)<br>n=28 (30.1%)<br>n=22 (23.7%)<br>n=23 (24.7%)<br>n=0<br>1.5 (1.1)<br>NR<br>NR<br>n=5 (5.6%) | NR<br>NR<br>NR<br>NR<br>NR | Data not available to calculate change<br><br>Mean change: Responders=-0.7*<br>Non-responders=0.25* | 0.02* (0.12)<br>7.4* (3.1); 14.9* (5.6)   |
|                                         |                                                                        |                        |                     | Mean fibrosis stage (SD)<br>Mean NFS score (SD)<br>Mean Fibrotest* (SD)<br>Biopsy confirmed fibrosis using NASH CRN criteria                                                           | F0<br>F1<br>F2<br>F3<br>F4                                   | n=39 (43.8%)<br>n=25 (28.1%)<br>n=20 (22.5%)<br>n=0<br>1.7 (0.9)<br>NR<br>NR<br>n=15 (16.3%)               | NR<br>NR<br>NR             | Mean change: Responders=-0.7*<br>Non-responders=0.25*                                               | -0.25*<br>-0.07*                          |
|                                         |                                                                        |                        | Placebo             | Mean fibrosis stage (SD)<br>Mean NFS score (SD)<br>Mean Fibrotest* (SD)<br>Biopsy confirmed fibrosis using NASH CRN criteria                                                           | F0<br>F1<br>F2<br>F3<br>F4                                   | n=32 (34.8%)<br>n=25 (27.2%)<br>n=20 (21.7%)<br>n=0<br>1.5 (1.0)<br>NR<br>NR                               | NR<br>NR                   | Data not available to calculate change                                                              | -0.01*<br>-0.01*                          |



Supplementary Table 2. Continued

| Study                                | Study design, duration & numbers recruited                                           | Relevant drug for NASH         | Patient group                         | Fibrosis marker                       | Fibrosis stage          | Baseline            | Follow-up           | Change in mean    | Change in serum biomarker score |
|--------------------------------------|--------------------------------------------------------------------------------------|--------------------------------|---------------------------------------|---------------------------------------|-------------------------|---------------------|---------------------|-------------------|---------------------------------|
| Harrison et al. <sup>12</sup> (2020) | Phase III (STELLAR-4), double blind, randomised, placebo-controlled, 48 weeks; n=877 | Selnosertib                    | 6 mg                                  | Biopsy confirmed fibrosis using NASH  | F0                      | n=0                 | n=1 (0.3%)          |                   |                                 |
|                                      |                                                                                      |                                |                                       | CRN criteria                          | F1                      | n=0                 | n=1 (0.3%)          |                   |                                 |
|                                      |                                                                                      |                                |                                       |                                       | F2                      | n=0                 | n=2 (0.6%)          |                   |                                 |
|                                      |                                                                                      |                                |                                       |                                       | F3                      | n=0                 | n=55 (15.7%)        |                   |                                 |
|                                      |                                                                                      |                                |                                       |                                       | F4                      | n=351 (100%)        | n=292 (83.2%)       |                   |                                 |
|                                      |                                                                                      |                                |                                       | Mean fibrosis stage <sup>a</sup> (SD) |                         | 4.0 (1.8)           | 3.8 (1.4)           |                   |                                 |
|                                      |                                                                                      |                                |                                       | Median ELF™ score (IQR)               |                         | 10.64 (10.01–11.34) | 10.84 (10.08–11.52) |                   | -0.2 <sup>d</sup>               |
|                                      |                                                                                      |                                |                                       | Median Fibrotest® (IQR)               |                         | 0.58 (0.41–0.73)    | 0.58 (0.39–0.73)    |                   | NC                              |
|                                      |                                                                                      |                                |                                       | Median APRI score (IQR)               |                         | 0.8 (0.5–1.3)       | 0.8 (0.5–1.3)       |                   | NC                              |
|                                      |                                                                                      |                                |                                       | Median FIB-4 score (IQR)              |                         | 2.48 (1.74–3.65)    | 2.58 (1.65–3.99)    |                   | 0.10 <sup>d</sup>               |
|                                      |                                                                                      | Median NFS score (IQR)         |                                       | 0.629 (-0.215 to 1.629)               | 0.984 (-0.031 to 1.814) |                     | 0.355 <sup>d</sup>  |                   |                                 |
|                                      |                                                                                      | Median VCTE reading, kPa (IQR) |                                       | 21.30 (14.0–29.8)                     | 20.40 (13.9–29.8)       |                     | -0.9 <sup>d</sup>   |                   |                                 |
|                                      |                                                                                      | 18 mg                          | Biopsy confirmed fibrosis using NASH  | F0                                    | n=0                     | n=0                 |                     |                   |                                 |
|                                      |                                                                                      |                                | CRN criteria                          | F1                                    | n=0                     | n=2 (0.6%)          |                     |                   |                                 |
|                                      |                                                                                      |                                |                                       | F2                                    | n=0                     | n=1 (0.3%)          |                     |                   |                                 |
|                                      |                                                                                      |                                |                                       | F3                                    | n=0                     | n=64 (18.1%)        |                     |                   |                                 |
|                                      |                                                                                      |                                |                                       | F4                                    | n=354 (100%)            | n=281 (81.1%)       |                     |                   |                                 |
|                                      |                                                                                      |                                | Mean fibrosis stage <sup>a</sup> (SD) |                                       | 4.0 (1.8)               | 3.7 (1.4)           |                     | -0.3 <sup>d</sup> |                                 |
|                                      |                                                                                      |                                | Median ELF™ score (IQR)               |                                       | 10.61 (10.04–11.34)     | 10.73 (10.07–10.51) |                     | 0.10 <sup>d</sup> |                                 |
|                                      |                                                                                      |                                | Median Fibrotest® (IQR)               |                                       | 0.58 (0.44–0.73)        | 0.58 (0.40–0.75)    |                     | NC                |                                 |
| Median APRI score (IQR)              |                                                                                      |                                | 0.8 (0.6–1.2)                         | 0.8 (0.5–1.3)                         |                         | NC                  |                     |                   |                                 |
| Median FIB-4 score (IQR)             |                                                                                      |                                | 2.55 (1.76–3.62)                      | 2.65 (1.74–3.76)                      |                         | 0.10 <sup>d</sup>   |                     |                   |                                 |
| Median NFS score (IQR)               |                                                                                      | 0.659 (-0.119 to 1.472)        | 0.816 (0.031–1.574)                   |                                       | 0.157 <sup>d</sup>      |                     |                     |                   |                                 |
| Median VCTE reading, kPa (IQR)       |                                                                                      | 21.10 (14.7–28.8)              | 19.4 (14.3–27.3)                      |                                       | -1.7 <sup>d</sup>       |                     |                     |                   |                                 |
| Placebo                              | Biopsy confirmed fibrosis using NASH                                                 | F0                             | n=0                                   | n=0                                   |                         |                     |                     |                   |                                 |
|                                      | CRN criteria                                                                         | F1                             | n=0                                   | n=0                                   |                         |                     |                     |                   |                                 |
|                                      |                                                                                      | F2                             | n=0                                   | n=0                                   |                         |                     |                     |                   |                                 |
|                                      |                                                                                      | F3                             | n=1 (0.6%)                            | n=27 (15.7%)                          |                         |                     |                     |                   |                                 |
|                                      |                                                                                      | F4                             | n=171 (99.4%)                         | n=145 (84.3%)                         |                         |                     |                     |                   |                                 |
|                                      | Mean fibrosis stage <sup>a</sup> (SD)                                                |                                | 3.7 (1.4)                             | 3.8 (1.5)                             |                         | 0.10 <sup>d</sup>   |                     |                   |                                 |
|                                      | Median ELF™ score (IQR)                                                              |                                | 10.67 (10.05–11.16)                   | 10.66 (10.14–11.26)                   |                         | -0.01 <sup>d</sup>  |                     |                   |                                 |
|                                      | Median Fibrotest® (IQR)                                                              |                                | 0.59 (0.40–0.77)                      | 0.57 (0.39–0.73)                      |                         | -0.02 <sup>d</sup>  |                     |                   |                                 |
|                                      | Median APRI score (IQR)                                                              |                                | 0.8 (0.6–1.2)                         | 0.7 (0.5–1.2)                         |                         | -0.1 <sup>d</sup>   |                     |                   |                                 |
|                                      | Median FIB-4 score (IQR)                                                             |                                | 2.50 (1.81–3.66)                      | 2.50 (1.65–3.67)                      |                         | NC                  |                     |                   |                                 |
| Median NFS score (IQR)               |                                                                                      | 0.682 (-0.304 to 1.450)        | 0.774 (-0.241 to 1.595)               |                                       | 0.092 <sup>d</sup>      |                     |                     |                   |                                 |
| Median VCTE reading, kPa (IQR)       |                                                                                      | 20.00 (14.4–26.7)              | 19.30 (13.8–26.7)                     |                                       | 0.70 <sup>d</sup>       |                     |                     |                   |                                 |

Supplementary Table 2. Continued

| Study                              | Study design, duration & numbers recruited                                     | Relevant drug for NASH     | Patient group                       | Fibrosis marker                                                                                                                                                                                                                                                                                                                                                                                                               | Fibrosis stage                           | Baseline                                                                         | Follow-up                                                                                                     | Change in mean | Change in serum biomarker score                                                         |
|------------------------------------|--------------------------------------------------------------------------------|----------------------------|-------------------------------------|-------------------------------------------------------------------------------------------------------------------------------------------------------------------------------------------------------------------------------------------------------------------------------------------------------------------------------------------------------------------------------------------------------------------------------|------------------------------------------|----------------------------------------------------------------------------------|---------------------------------------------------------------------------------------------------------------|----------------|-----------------------------------------------------------------------------------------|
| Loomba et al. <sup>13</sup> (2018) | Phase 2, double blind, randomised, de facto placebo-controlled; 24 weeks; n=72 | Selonsertib<br>±Simtuzumab | Selonsertib 6mg<br>±Simtuzumab      | Biopsy confirmed F3 using NASH CRN criteria<br>Median ELF™ score (IQR)<br>Median Fibrotest® (IQR)<br>Median VCTE reading, kPa (IQR)<br>Biopsy confirmed F3 using NASH CRN criteria                                                                                                                                                                                                                                            |                                          | n=20 (67%)<br>NR<br>NR<br>NR<br>n=21 (66%)                                       | Improvement n=8 (30%)<br>Cirrhosis n=2 (7%)<br>NR<br>NR<br>NR<br>Improvement n=13 (43%)<br>Cirrhosis n=1 (3%) |                | -0.07 (-0.46 to 0.36)<br>0.02 (-0.03 to 0.08)<br>-0.80 (-1.90 to 2.30)                  |
|                                    |                                                                                |                            | 18 mg<br>±Simtuzumab                | Median ELF™ score (IQR)<br>Median Fibrotest® (IQR)<br>Median VCTE reading, kPa (IQR)<br>Biopsy confirmed F3 using NASH CRN criteria                                                                                                                                                                                                                                                                                           |                                          | NR<br>NR<br>NR<br>n=6 (60%)                                                      | NR<br>NR<br>NR<br>Improvement n=2 (20%)<br>Cirrhosis n=2 (20%)                                                |                | 0.02 (-0.34 to 0.52)<br>-0.01 (-0.03 to 0.03)<br>0.2 (-3.50 to 1.40)                    |
|                                    |                                                                                |                            | Simtuzumab                          | Median ELF™ score (IQR)<br>Median Fibrotest® (IQR)<br>Median VCTE reading, kPa (IQR)<br>Biopsy confirmed F3 using NASH CRN criteria                                                                                                                                                                                                                                                                                           |                                          | NR<br>NR<br>NR<br>n=6 (60%)                                                      | NR<br>NR<br>NR<br>Improvement n=2 (20%)<br>Cirrhosis n=2 (20%)                                                |                | -0.13 (-0.35 to 0.05)<br>0.01 (-0.04 to 0.05)<br>-0.50 (-3.80 to 3.4)                   |
| Raziu et al. <sup>15</sup> (2018)  | Phase 2b, double blind, randomised, placebo-controlled; 52 weeks; n=247        | Aramachol                  | 400 mg<br><br>600 mg<br><br>Placebo | Biopsy confirmed fibrosis using NASH CRN staging system<br>FIB-4 change from baseline to week 52<br>NFS change from baseline to week 52<br>Biopsy confirmed fibrosis using NASH CRN staging system<br>FIB-4 change from baseline to week 52<br>NFS change from baseline to week 52<br>Biopsy confirmed fibrosis using NASH CRN staging system<br>FIB-4 change from baseline to week 52<br>NFS change from baseline to week 52 | F2<br>F3<br><br>F2<br>F3<br><br>F2<br>F3 | 18.8%<br>45.7%<br>NR<br>22.4%<br>36.7%<br>NR<br>NR<br>16.7%<br>33.3%<br>NR<br>NR | NR<br>NR<br>NR<br>NR<br>NR<br>NR<br>NR<br>NR<br>NR<br>NR<br>NR<br>NR                                          |                | -0.05±0.06<br>-0.12±0.08<br><br>-0.10±0.06<br>-0.04±0.08<br><br>-0.12±0.08<br>0.23±0.11 |

NR, not reported; NC, no change; ELF™, enhanced liver fibrosis; FIB-4, fibrosis-4; NFS, NAFLD fibrosis score; APRI, aspartate transaminase to platelet ratio index; PRO-C3, Type III collagen marker of the N-terminal pro-peptide; SD, standard deviation; IQR, interquartile range; VCTE, vibration controlled transient elastography; CI, confidence interval.

<sup>a</sup>Mean not provided, calculation made using data provided in the manuscript tables and supplementary information. <sup>b</sup>Manufacturers published cut off thresholds for fibrosis. <sup>14</sup>Biopsy validated cut-off thresholds for fibrosis. <sup>3</sup>No standard deviation/IQR reported. <sup>c</sup>Change in biomarker score is the change reported in the research paper and not the exact difference between baseline and follow-up. <sup>d</sup>Plus-minus values are means±SD. <sup>e</sup>Plus-minus values are geometric means±coefficient of variation. <sup>h</sup>An ELF™ score greater than 9.8 indicates a moderate risk of advanced fibrosis, and a score of greater than 11.3 denotes a high risk of advanced fibrosis. <sup>i</sup>No geometric means±coefficient of variation reported. <sup>j</sup>Fibrosis stage was classified according to the SAF-NASH CRN staging system. <sup>k</sup>A Fibrosis-4 index score of less than 1.45 indicates low probability of stage F3 or F4 fibrosis, and a score greater than 3.25 indicates a high probability of stage F3 or F4 fibrosis. <sup>l</sup>An ELF™ score of less than 7.7 indicates none to mild fibrosis, and a score of 11.3 or greater indicates cirrhosis. <sup>m</sup>n value is approximate and was calculated from the % improvement recorded in Table 4 of the manuscript. <sup>6</sup>Improvement/no improvement or worsening reported, unable to calculate changes in fibrosis stage as data is not provided. <sup>o</sup>Estimated values only, exact values not recorded, data taken from manuscript<sup>6</sup> Figure 3, (f) and (g). <sup>p</sup>Mean difference reported for subjects with ELF™ ≥9.0 only (n=21) at week 12. <sup>q</sup>Mean difference reported for subjects with Baseline ≥10.00 ng/mL (n=25). <sup>r</sup>Mean difference reported for subjects with Baseline ≥17.50 ng/mL (n=12). <sup>s</sup>Mean difference reported for subjects with Baseline ≥10.00 ng/mL (n=53). <sup>t</sup>Mean difference reported for subjects with Baseline ≥17.50 ng/mL (n=29). <sup>u</sup>Bridging fibrosis.

\*Data for baseline, follow-up and change in ELF™ score taken from Supplementary Table 6.<sup>2</sup>

## REFERENCES (Supplementary Table 2)

1. Newsome PN, Buchholtz K, Cusi K, Linder M, Okanou T, Ratziu V, et al. A placebo-controlled trial of subcutaneous semaglutide in nonalcoholic steatohepatitis. *N Engl J Med* 2021;384:1113-1124.
2. Friedman SL, Ratziu V, Harrison SA, Abdelmalek MF, Aithal GP, Caballeria J, et al. A randomized, placebo-controlled trial of cenicriviroc for treatment of nonalcoholic steatohepatitis with fibrosis. *Hepatology* 2018;67:1754-1767.
3. Francque SM, Bedossa P, Ratziu V, Anstee QM, Bugianesi E, Sanyal AJ, et al. A randomized, controlled trial of the Pan-PPAR agonist lanifibranor in NASH. *N Engl J Med* 2021;385:1547-1558.
4. Harrison SA, Alkhoury N, Davison BA, Sanyal A, Edwards C, Colca JR, et al. Insulin sensitizer MSDC-0602K in non-alcoholic steatohepatitis: a randomized, double-blind, placebo-controlled phase IIb study. *J Hepatol* 2020;72:613-626.
5. Armstrong MJ, Gaunt P, Aithal GP, Barton D, Hull D, Parker R, et al. Liraglutide safety and efficacy in patients with non-alcoholic steatohepatitis (LEAN): a multicentre, double-blind, randomised, placebo-controlled phase 2 study. *Lancet* 2016;387:679-690.
6. Chalasani N, Abdelmalek MF, Garcia-Tsao G, Vuppalanchi R, Alkhoury N, Rinella M, et al. Effects of belapectin, an inhibitor of galectin-3, in patients with nonalcoholic steatohepatitis with cirrhosis and portal hypertension. *Gastroenterology* 2020;158:1334-1345.e5.
7. Harrison SA, Neff G, Guy CD, Bashir MR, Paredes AH, Frias JP, et al. Efficacy and safety of aldafermin, an engineered FGF19 analog, in a randomized, double-blind, placebo-controlled trial of patients with nonalcoholic steatohepatitis. *Gastroenterology* 2021;160:219-231.e1.
8. Harrison SA, Ruane PJ, Freilich BL, Neff G, Patil R, Behling CA, et al. Efruxifermin in non-alcoholic steatohepatitis: a randomized, double-blind, placebo-controlled, phase 2a trial. *Nat Med* 2021;27:1262-1271.
9. Loomba R, Noureddin M, Kowdley KV, Kohli A, Sheikh A, Neff G, et al. Combination therapies including Cilofexor and Firsocostat for bridging fibrosis and cirrhosis attributable to NASH. *Hepatology* 2021;73:625-643.
10. Harrison SA, Bashir MR, Guy CD, Zhou R, Moylan CA, Frias JP, et al. Resmetirom (MGL-3196) for the treatment of non-alcoholic steatohepatitis: a multicentre, randomised, double-blind, placebo-controlled, phase 2 trial. *Lancet* 2019;394:2012-2024.
11. Ratziu V, Harrison SA, Francque S, Bedossa P, Leher P, Serfaty L, et al. Elafibranor, an agonist of the peroxisome proliferator-activated receptor- $\alpha$  and - $\delta$ , induces resolution of nonalcoholic steatohepatitis without fibrosis worsening. *Gastroenterology* 2016;150:1147-1159.e5.
12. Harrison SA, Wong VW, Okanou T, Bzowej N, Vuppalanchi R, Younes Z, et al. Selonsertib for patients with bridging fibrosis or compensated cirrhosis due to NASH: results from randomized phase III STELLAR trials. *J Hepatol* 2020;73:26-39.
13. Loomba R, Lawitz E, Mantry PS, Jayakumar S, Caldwell SH, Arnold H, et al. The ASK1 inhibitor selonsertib in patients with nonalcoholic steatohepatitis: a randomized, phase 2 trial. *Hepatology* 2018;67:549-559.
14. SIEMENS Healthineers. Download the ELF™ test literature compendium: volume 1. SIEMENS Healthineers web site, <<https://www.siemens-healthineers.com/en-uk/laboratory-diagnostics/assays-by-diseases-conditions/liver-disease/elf-literature-compendium>>.
15. Ratziu V, de Guevara L, Safadi R, Poordad F, Fuster F, Flores-Figueroa J, et al. One-year results of the global phase 2b randomized placebo-controlled ARREST trial of aramchol, a stearyl CoA desaturasemodulator in NASH patients. *The Liver Meeting* 2018; 2018 Nov 9-13; San Francisco, CA.
